# Supplementary material for: Long-term electrocatalytic N2 fixation by MOF-derived Y-stabilized ZrO2: insight into the deactivation mechanism
Source: Royal Society of Chemistry journal article supplement (doi:10.1039/d0ta01154a), 2020-01-01
Supplement: d0ta01154a1.pdf [file d0ta01154a1.pdf]

## **Supporting Information**

# **Long-Term Electrocatalytic N<sub>2</sub> Fixation by MOF-Derived Y-Stabilized ZrO<sub>2</sub>: An Insight into Deactivation Mechanism**

Shijian Luo,<sup>a</sup> Xiaoman Li,<sup>a,\*</sup> Mingyuan Wang,<sup>b</sup> Xu Zhang,<sup>a</sup> Wanguo Gao,<sup>a</sup>

Senda Su,<sup>a</sup> Guiwu Liu,<sup>b,\*</sup> and Min Luo<sup>a,\*</sup>

a. State Key Laboratory of High-efficiency Utilization of Coal and Green Chemical Engineering, School of Chemistry and Chemical Engineering, Ningxia University, Yinchuan, Ningxia, 750021, China

b. School of Materials Science and Engineering, Jiangsu University, Zhenjiang, Jiangsu, 212013, China

\*Corresponding author: Min Luo martinluomin@163.com,

Xiaoman Li lixm2017@nxu.edu.cn,

Guiwu Liu gwliu76@ujs.edu.cn

## Content

|                                                                           |          |
|---------------------------------------------------------------------------|----------|
| XRD pattern of UiO-66 and Y-UiO-66.....                                   | Fig. S1  |
| The Raman pattern of C@YSZ and C@ZrO <sub>2</sub> .....                   | Fig. S2  |
| XPS C 1s spectra for the C@YSZ.....                                       | Fig. S3  |
| XPS spectra of C@ZrO <sub>2</sub> .....                                   | Fig. S4  |
| SEM image of UiO-66 and Y-UiO-66.....                                     | Fig. S5  |
| SEM, TEM, HRTEM images of C@ZrO <sub>2</sub> .....                        | Fig. S6  |
| EDX data.....                                                             | Fig. S7  |
| UV-Vis absorption spectra and Calibration curve.....                      | Fig. S8  |
| UV-Vis absorption spectra of catalyst at different potentials.....        | Fig. S9  |
| Chronoamperometry results.....                                            | Fig. S10 |
| Ion Chromatography data.....                                              | Fig. S11 |
| XRD, XPS pattern and NRR performance of monoclinic ZrO <sub>2</sub> ..... | Fig. S12 |
| XRD, Raman pattern and NRR performance of carbon.....                     | Fig. S13 |
| NRR performance in different electrolytes.....                            | Fig. S14 |
| UV-Vis absorption spectra and Calibration curve.....                      | Fig. S15 |
| N <sub>2</sub> H <sub>4</sub> detection.....                              | Fig. S16 |
| NRR performance of carbon paper.....                                      | Fig. S17 |
| Arrhenius plot.....                                                       | Fig. S18 |
| NRR performance of C@YSZ in air.....                                      | Fig. S19 |
| NRR performance against the size of working electrode.....                | Fig. S20 |
| Time-dependent current density curve.....                                 | Fig. S21 |
| CV curves.....                                                            | Fig. S22 |
| XRD, SEM and XPS of C@YSZ after 7 days NRR.....                           | Fig. S23 |
| XRD, SEM and XPS of C@ZrO <sub>2</sub> after 3 days NRR.....              | Fig. S24 |
| Comparison of NRR performance under ambient conditions.....               | Table S1 |

## EXPERIMENTAL SECTION

### Materials

All reagents used in this experiment were of analytical grade without further purification. Zirconium chloride ( $ZrCl_4$ , 98%), yttrium chloride ( $YCl_3$ , 98%), terephthalic acid ( $H_2BDC$ , 99%), acetic acid ( $C_2H_4O_2$ , 99.5%) and N, N-dimethylformamide (DMF, 99.8%) were purchased from Aladdin chemistry Co. Acetone (99.5%) were purchased from Sinopharm Chemical Reagent Co. Nafion (5 wt%) were purchased from Sigma-Aldrich Chemical Reagent Co.,Ltd. Deionized water was purified through a Millipore system.

### Synthesis of precursor UiO-66 and Y-UiO-66

First, zirconium chloride was selected as the zirconium source, yttrium chloride as the yttrium source, terephthalic acid as the ligand, and acetic acid as the conditioner. Typically, 0.507 mmol  $ZrCl_4$ , 0.031 mmol  $YCl_3$  and 0.507 mmol  $H_2BDC$  and 26 ml DMF were put into a 50 mL Telfon vessel and stirred for 30 min until a homogeneous clear solution is obtained. Then 1 mL acetic acid was added. After magnetically stirred for 30 min, the above mixture was placed in autoclave and reacted at 120 °C for 24 hours. The precipitate was washed alternately with DMF and acetone by centrifugation. The solid product (Y-UiO-66) was collected and dried in a vacuum oven at 80 °C for 12 h. If  $YCl_3$  wasn't added in the above process, the product is UiO-66.

### Synthesis of C@YSZ and C@ZrO<sub>2</sub> electrocatalysts

Y-UiO-66 was heated in a furnace in Ar from room temperature to 900°C at a heating rate of 2°C min<sup>-1</sup> and maintained for 2 h to obtain C@YSZ electrocatalyst. UiO-66 was heated in a furnace in Ar from room temperature to 900°C at a heating rate of 2°C min<sup>-1</sup> and maintained for 2 h to obtain C@ZrO<sub>2</sub> electrocatalyst.

### Synthesis of monoclinic C@ZrO<sub>2</sub>-600 sample

UiO-66 was heated in a furnace in Ar from room temperature to 600°C at a heating rate of 2°C min<sup>-1</sup> and maintained for 2 h to obtain monoclinic C@ZrO<sub>2</sub>-600 sample.

### Preparation of working electrode

The carbon paper was sonicated for 1 h in ethanol solution and dried at ambient condition. 10 mg catalyst and 100 μL of Nafion solution (5 wt%) were dispersed in mixed solution contain 700 μL isopropanol and 200 μL H<sub>2</sub>O by 1 h sonication to form a homogeneous ink. Then 20 μL catalyst ink was loaded on a 1 × 1 cm<sup>2</sup> carbon paper and dried at 60°C for 12 h.

### Characterizations

X-ray diffraction (XRD) data were obtained from an AXS D8 ADVANCE A25 with Cu K $\alpha$  radiation (40 kV, 40 mA) of wavelength 0.154 nm (Germany). SEM images and Energy Dispersive Spectrometer (EDS) were collected from the ZEISS EVO18 scanning electron microscope at an accelerating voltage of 40 kV (Germany). TEM images were obtained from a

FEI Talos 200S transmission electron microscope operated at 200 kV. The size of prepared samples is measured by a NanoMeasurer 1.2 software. XPS measurements were performed on a Thermo escalab 250Xi X-ray photoelectron spectrometer using Mg as the exciting source. The Raman spectra were collected on a Thermo Fisher Raman spectrometer under a backscattering geometry ( $\lambda = 532$  nm). The electron paramagnetic resonance (EPR) were obtained from Bruker A300-10/12 system. Temperature programmed desorption (TPD) were carried out on an AutoChem II 2920 system. Nuclear magnetic resonance was tested on a Bruker AVANCE III 600 MHz system. The absorbance data of spectrophotometer were measured on Persee TU-19 UV-Vis spectrophotometer. The Ion chromatography (IC) were tested on an Agilent 7500ce system.

### **Electrochemical measurements**

N<sub>2</sub> reduction experiments were carried out in a two-compartment cell, which was separated by the Nafion 211 membrane. The electrochemical experiments were performed with a CHI 660E electrochemical analyzer (CH Instruments, Inc., Shanghai, China) using a three-electrode configuration including prepared working electrode, platinum sheet electrode and saturated Ag/AgCl (saturated KCl electrolyte) serving as the working electrode, counter electrode and reference electrode, respectively. The potentials reported in this work were converted to RHE scale via calibration with the following equation:  $E$  (vs. RHE) =  $E$  (vs. Ag/AgCl) + 0.197 + 0.059 × pH. For N<sub>2</sub> reduction experiments, the 0.1 M Na<sub>2</sub>SO<sub>4</sub> electrolyte was purged with N<sub>2</sub> for 30 min before the measurement. Potentiostatic test was conducted in N<sub>2</sub>-saturated 0.1 M Na<sub>2</sub>SO<sub>4</sub> solution (70 mL) for 1 hour. Each NRR test was repeated at least three times. The error bar was based on the standard deviation (SD) for three times NRR tests.

### **Determination of NH<sub>4</sub><sup>+</sup>**

NH<sub>3</sub>/NH<sub>4</sub><sup>+</sup> concentration analysis was conducted using Nessler's reagent method. First, 50 mL of the solution was placed in a 50 mL flask. Then, 1 mL of the potassium sodium tartrate solution was added to the flask. After blending, 1 mL of Nessler's reagent was added to the same flask and mixed. Then, the mixture was left to stand for 10 min for full color processing. Finally, the concentration of NH<sub>3</sub>/NH<sub>4</sub><sup>+</sup> was tested using an UV-vis spectrophotometer at 420 nm wavelength. The fitting curve ( $y = 0.1685x + 0.008$ ,  $R^2 = 0.998$ ) shows good linear relation of absorbance value with NH<sub>4</sub><sup>+</sup> concentration.

### **Determination of N<sub>2</sub>H<sub>4</sub>**

The N<sub>2</sub>H<sub>4</sub> in the electrolyte was estimated by the method of Watt and Chrisp. A mixture of C<sub>9</sub>H<sub>11</sub>NO (5.99 g), HCl (concentrated, 30 mL) and ethanol (300 mL) was used as a color reagent. In detail, 5 mL electrolyte was removed from the electrochemical reaction vessel and added into 5 mL above prepared color reagent and stirring 15 min at room temperature. The absorbance of the resulting solution was measured at 455 nm. The concentration absorbance curves were calibrated using standard N<sub>2</sub>H<sub>4</sub>·H<sub>2</sub>O solution with a series of concentrations. The fitting curve ( $y = 1.6331x + 0.0187$ ,  $R^2 = 0.999$ ) shows good linear relation of absorbance value with N<sub>2</sub>H<sub>4</sub>

concentration.

### Isotope labeling experiment and NMR test.

The  $^{15}\text{N}_2$  isotopic labeling experiment was carried out using  $^{15}\text{N}_2$  as the feeding gas (Shanghai Research Institute of Chemical Industry C, 98 atom %  $^{15}\text{N}$ ) with 0.1 M  $\text{Na}_2\text{SO}_4$  electrolyte. After electrolysis at  $-0.5$  V vs. RHE for 2 h, 10 mL of the electrolyte was taken out and acidized to pH  $\sim 3$  by adding 0.5 M  $\text{H}_2\text{SO}_4$ . Afterwards, 0.9 mL of the resulting solution was taken out and mixed with 0.1 mL  $\text{D}_2\text{O}$  containing 100 ppm dimethyl-sulphoxide (Sigma-Aldrich, 99.99%) as an internal standard for  $^1\text{H}$  nuclear magnetic resonance measurement ( $^1\text{H}$  NMR, Bruker Avance III 600 MHz).

### Long-term stability test

Long-term NRR test was conducted in 0.1 M  $\text{Na}_2\text{SO}_4$  solution (90 mL) for 7 days under  $\text{N}_2$ -saturated atmosphere and isothermal conditions. At the first hour, first day, third day, 5th day and 7th day of NRR test, 10 mL electrolyte was taken to measure the ammonia concentration through Nessler's reagent method. The long-term stability tests were repeated three times to reduce errors caused by environmental factors.

### Calculations of $\text{NH}_3$ formation rate and Faradaic efficiency (FE)

The rate of formation of  $\text{NH}_3$  was calculated using the following equation:

$$v_{\text{NH}_3} = \frac{[\text{NH}_3] \times V}{t \times m_{\text{cat.}}}$$

The FE was calculated according to the following equation:

$$\text{FE} = \frac{3 \times F \times [\text{NH}_3] \times V}{17 \times Q}$$

where  $[\text{NH}_3]$  is the measured concentration of  $\text{NH}_4^+$  ions;  $V$  is the volume of the cathodic reaction electrolyte;  $t$  is the time for which the potential was applied;  $m$  is the mass of catalyst loaded on the working electrode;  $F$  is the Faraday constant; and  $Q$  is the quantity of applied charge/electricity.

### In-situ electrochemical quartz-crystal microbalance (EQCM) tests

The working electrode is prepared as follow: 10 mg catalyst and 100  $\mu\text{L}$  of Nafion solution (5 wt %) were dispersed in mixed solution contain 700  $\mu\text{L}$  isopropanol and 200  $\mu\text{L}$   $\text{H}_2\text{O}$  by 1 h sonication to form a homogeneous ink. Then 20  $\mu\text{L}$  catalyst ink was loaded on the Quartz crystal and dried at  $80^\circ\text{C}$  for 24 h. The saturated  $\text{Ag}/\text{AgCl}$  electrode and Pt electrode were served as the reference electrode and the counter electrode. The electrolyte was 0.1 M  $\text{Na}_2\text{SO}_4$ . The mass change ( $\Delta m$ ) was calculated by following equation.

$$\Delta m = -\frac{\sqrt{\rho_q \mu_q}}{2f_0} \times \Delta f = -C_f \Delta f$$

where  $\Delta f$  is the varication of frequency,  $C_f$  is the sensitivity factor of a quartz crystal (1.46 ng

$\text{Hz}^{-1}$ ),  $\rho_q$  is the density of a quartz crystal ( $2.648 \text{ g cm}^{-3}$ ),  $\mu_q$  is the shear modulus of a quartz crystal,  $f_0$  is the fundamental frequency of a quartz crystal (8 MHz).

### **DFT calculation details**

All calculations were performed using first-principles calculations based on DFT through the Vienna ab initio simulation package (VASP). The Perdew-Burke-Ernzerhof (PBE) exchange-correction functional for generalized gradient approximation (GGA) was used to optimize all the geometric structures and the interactions between ions and valence electrons were described by the super soft pseudopotential. The kinetic energy cutoff for the plane wave basis was set as 500 eV. A  $3 \times 3 \times 1$  Monkhorst–Pack k-point sampling was used for all the surfaces and A vacuum space of at least 20 Å was included in the unit cell. All structures were relaxed until the forces exerted on each atom were less than 0.01 eV/Å. The energy convergence criteria for electronic and ionic iterations were assumed to be  $10^{-5}$  and  $10^{-4}$  eV, respectively. In this article, a  $2 \times 2 \times 4$  supercell  $\text{ZrO}_2$  (011) with one O-vacancy and a Y atom substitutes Zr atom of  $\text{ZrO}_2$  (011) with one O-vacancy are constructed to calculate the thermodynamic stability of the surface O-vacancies. The bottom two layers were fixed to simulate the bulk, whereas the two topmost layers were allowed to fully relax. And the thermodynamic stability of O-Vacancies on the surfaces is calculated according to following formula:

$$\Delta E_{\text{vac}} = E_{\text{vac},2} - E_{\text{vac},1}$$

Where  $E_{\text{vac},2}$  represent the energy of an O-vacancy in the first subsurface layer;  $E_{\text{vac},1}$  represent the energy of  $\text{ZrO}_2$  slab with an O-vacancy in the surface layer.

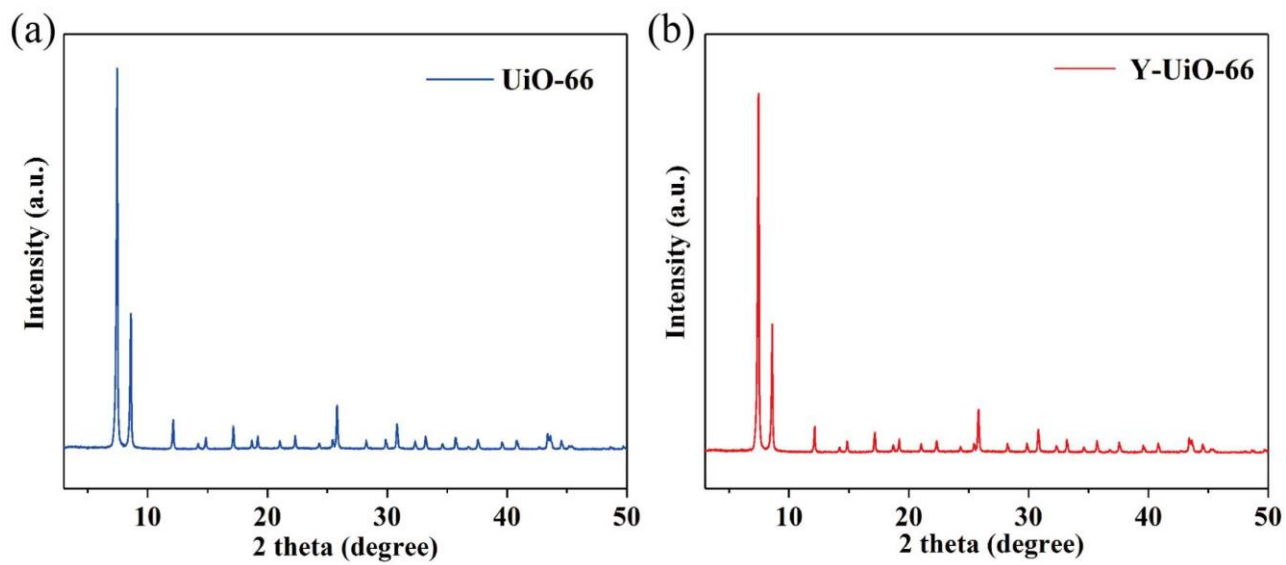

**Fig. S1.** (a) XRD pattern of UiO-66. (b) XRD pattern of Y-UiO-66.

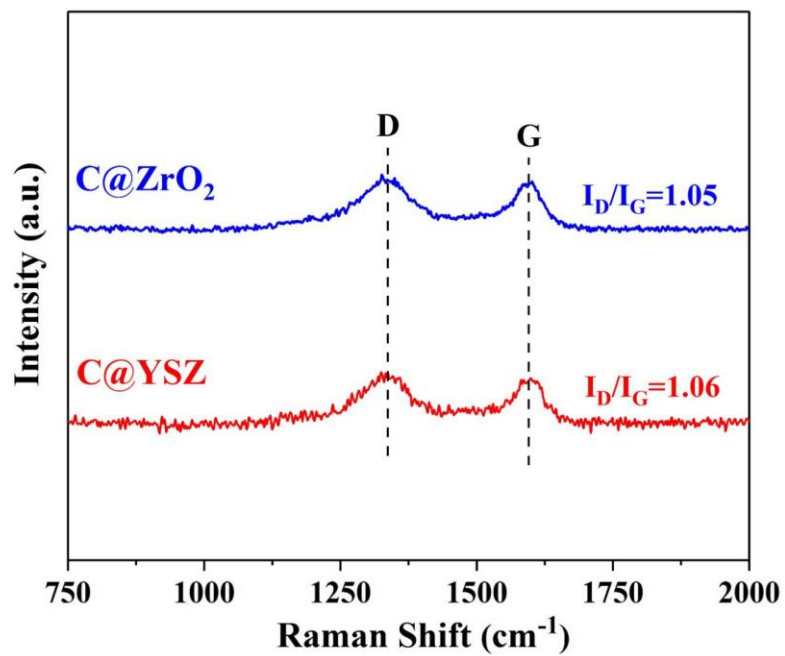

Fig. S2. The Raman pattern of C@YSZ and C@ZrO<sub>2</sub>.



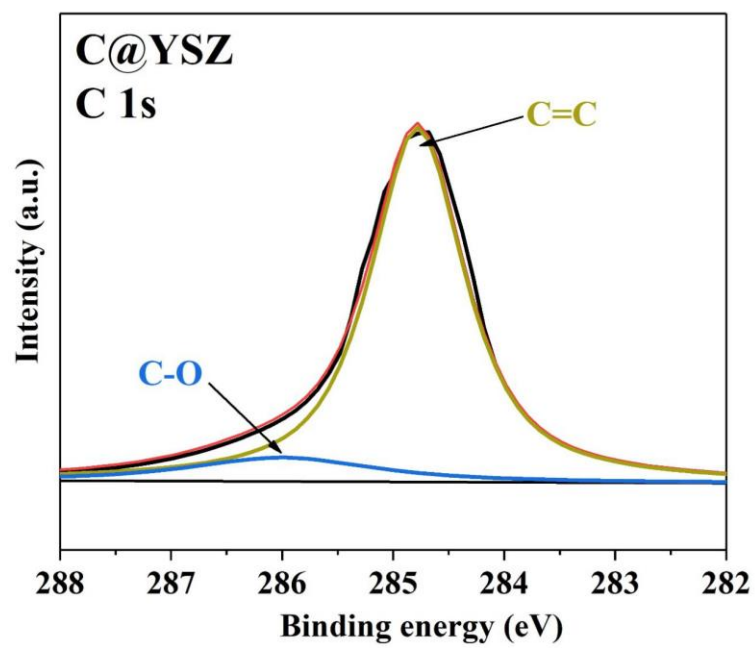

Fig. S3. XPS C 1s spectra for the C@YSZ.

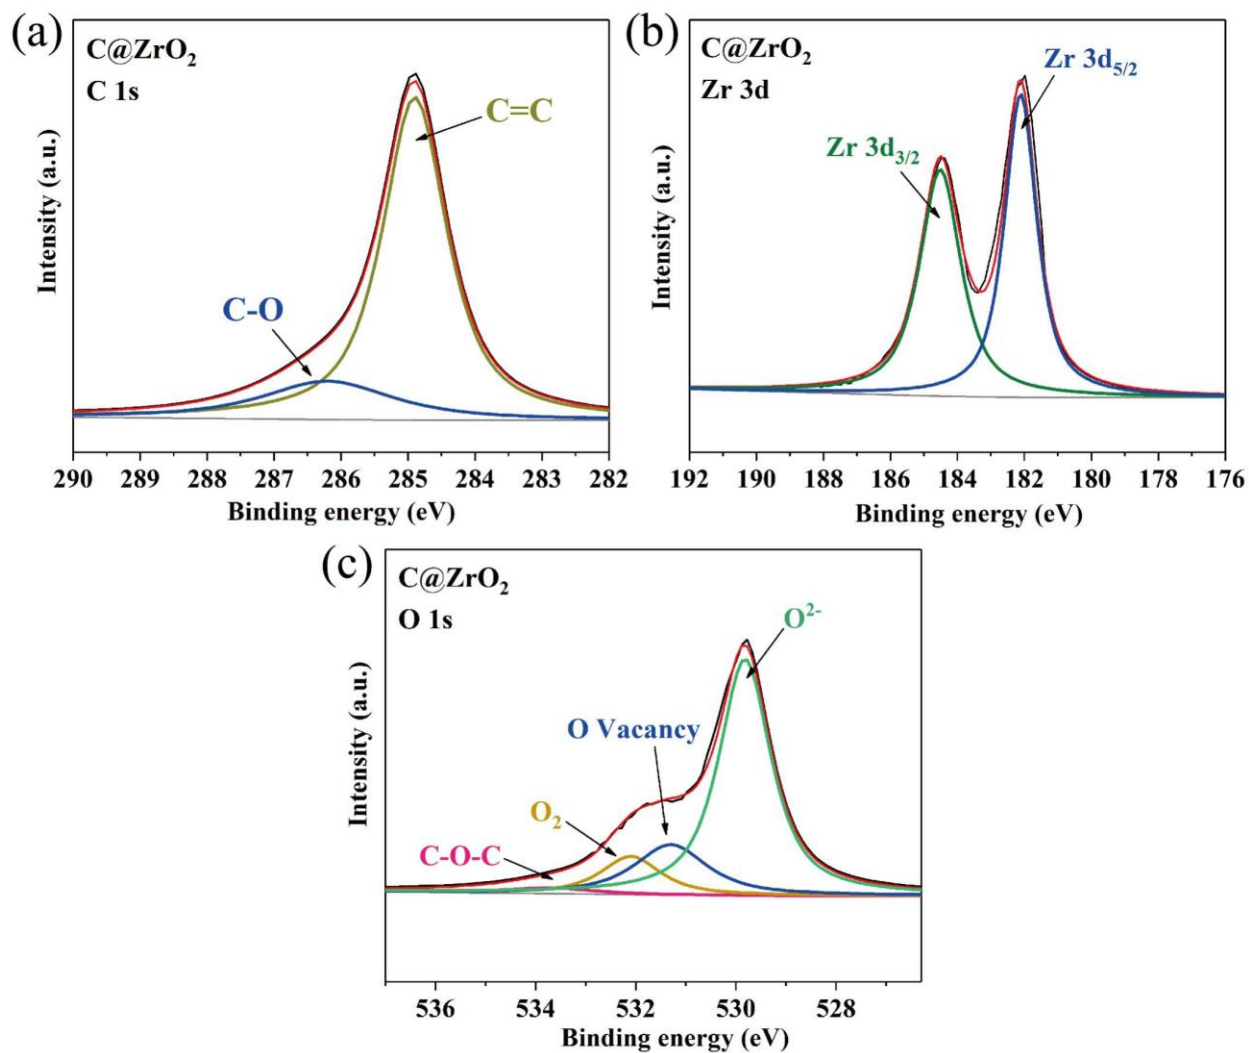

**Fig. S4.** (a) XPS C 1s spectra, (b) XPS Zr 3d spectra and (c) XPS O 1s spectra of the C@ZrO<sub>2</sub>.

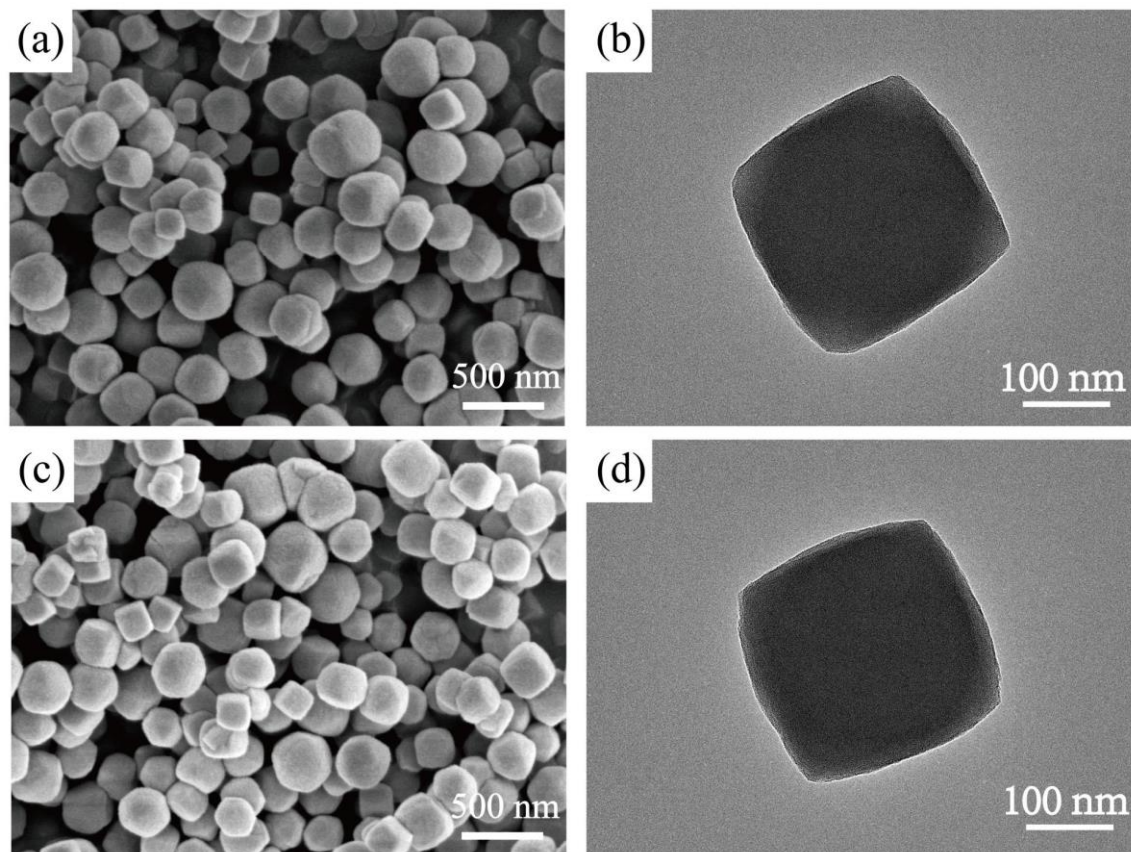

**Fig. S5.** SEM and TEM image of UiO-66 (a), (b) and Y-UiO-66 (c), (d).

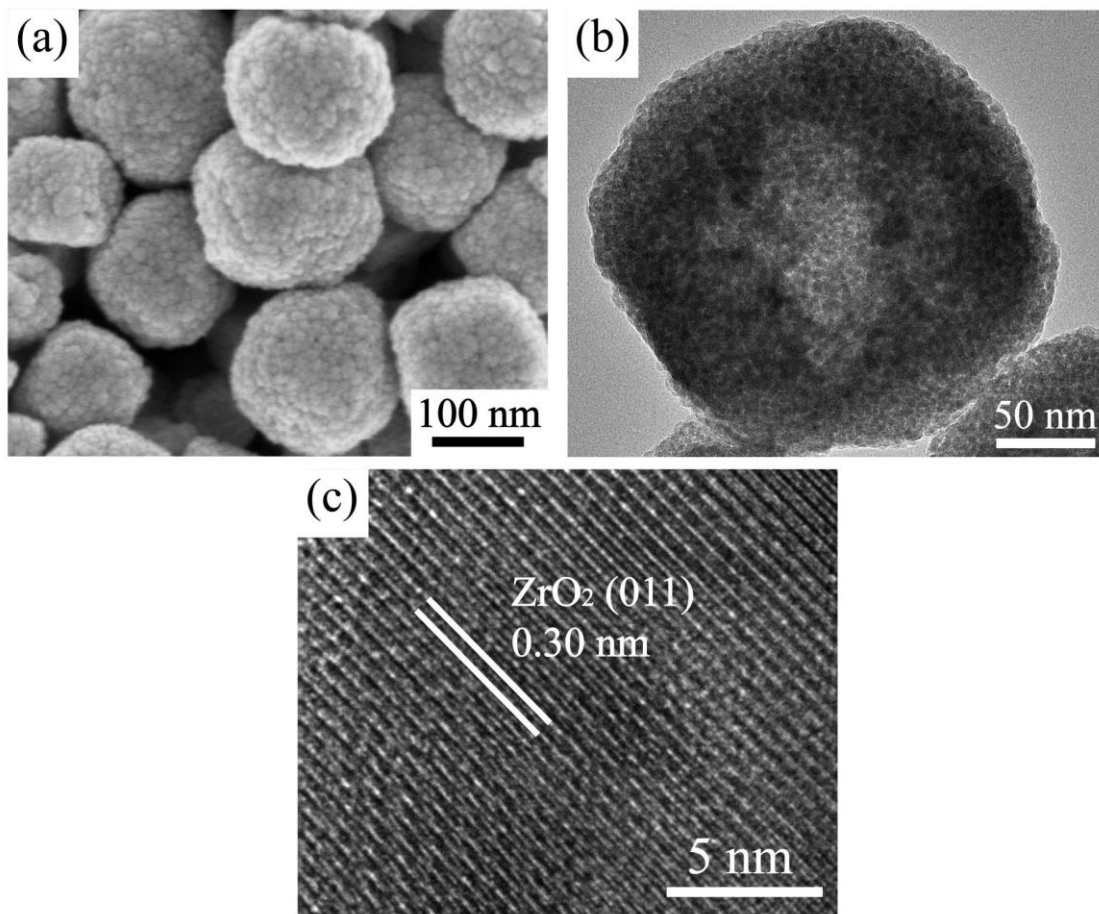

**Fig. S6.** (a) SEM image, (b) TEM image and (c) HRTEM image of  $\text{C@ZrO}_2$ .

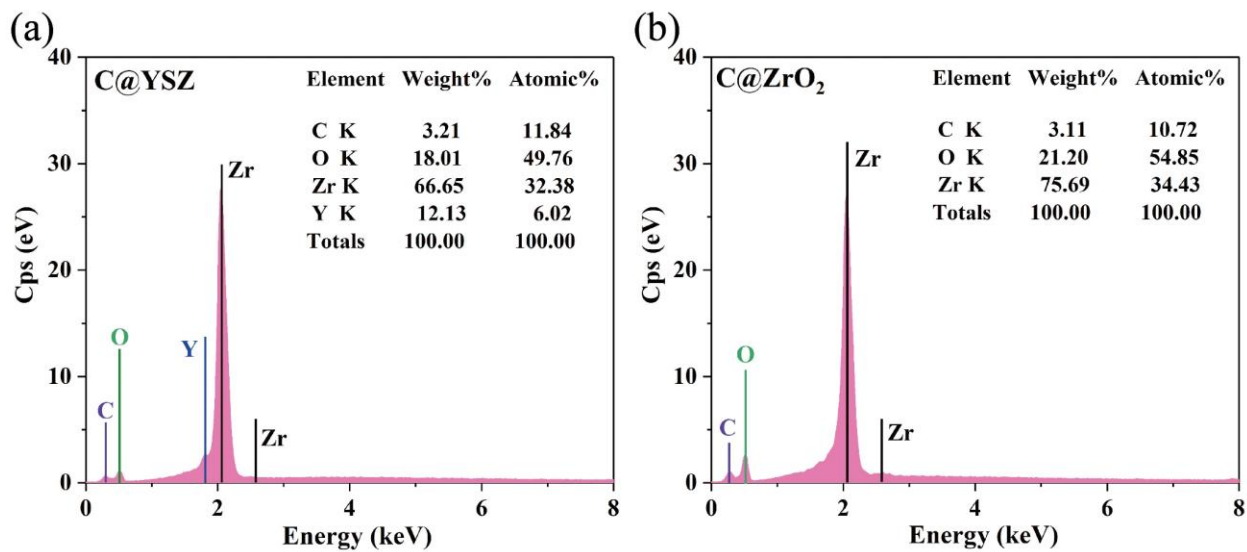

Fig. S7. (a) EDX data of C@YSZ. (b) EDX data of C@ZrO<sub>2</sub>.

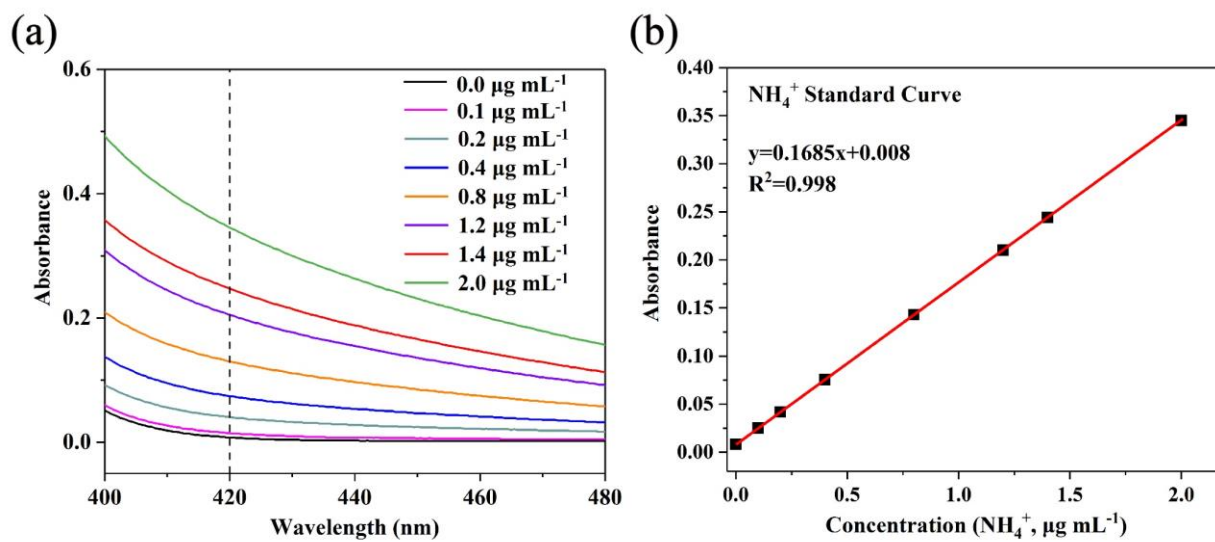

**Fig. S8.** (a) UV-Vis absorption curves of Nessler's reagent assays kept with different concentrations of  $\text{NH}_4^+$  ions. (b) A calibration curve used to estimate the concentrations of  $\text{NH}_4^+$  ions.

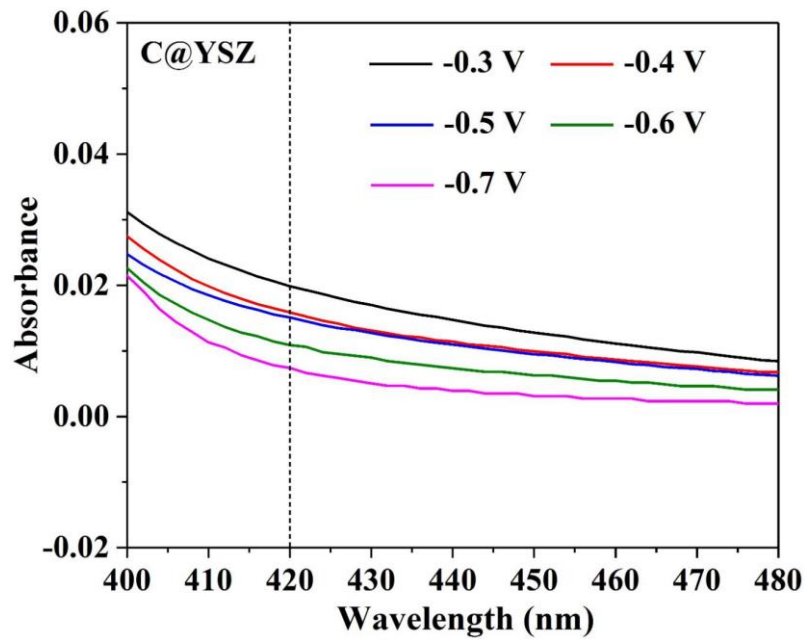

**Fig. S9.** UV-Vis absorption curves of the electrolyte after tests of C@YSZ at different potentials.

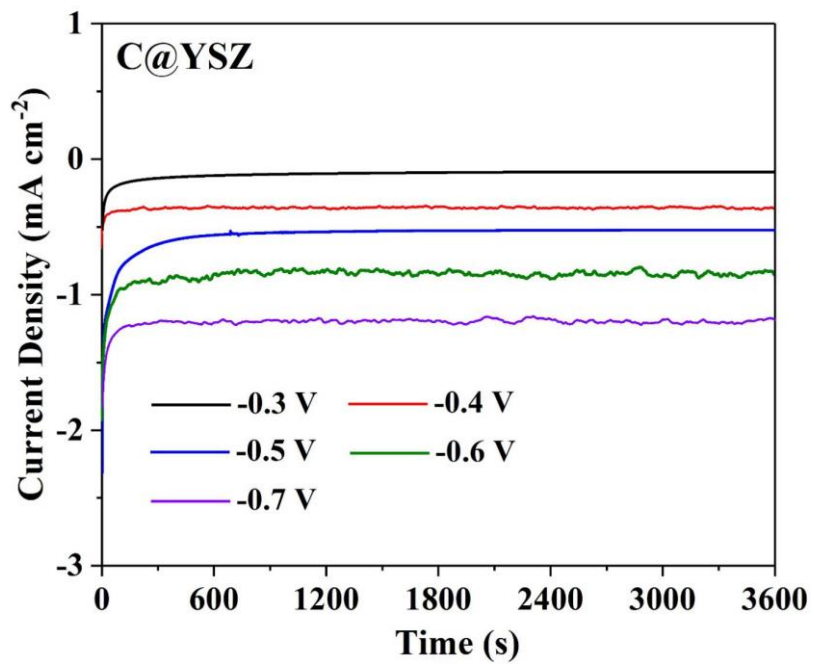

**Fig. S10.** Time-dependent current density curve for C@YSZ at different potentials.



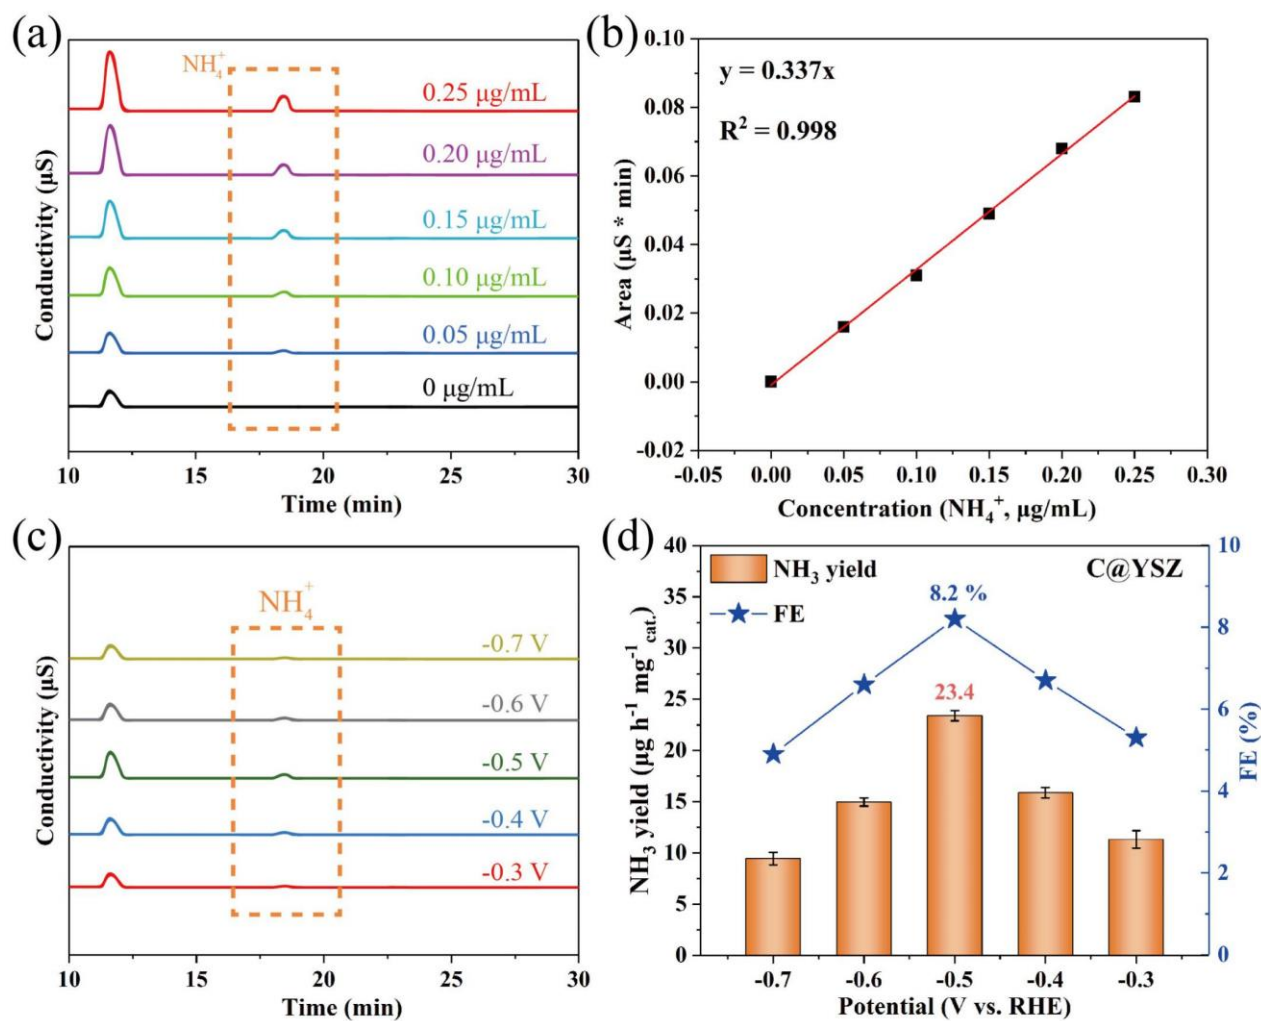

**Fig. S11.** (a) Ion chromatograms of  $\text{NH}_4^+$  with different concentrations in 0.1 M  $\text{Na}_2\text{SO}_4$  and (b) corresponding standard curve. (c) Ion chromatogram data for the electrolytes at a series of potentials after electrolysis for 1 h. (d)  $\text{NH}_3$  yields and FEs for C@YSZ at corresponding potentials calculated by ion chromatography.

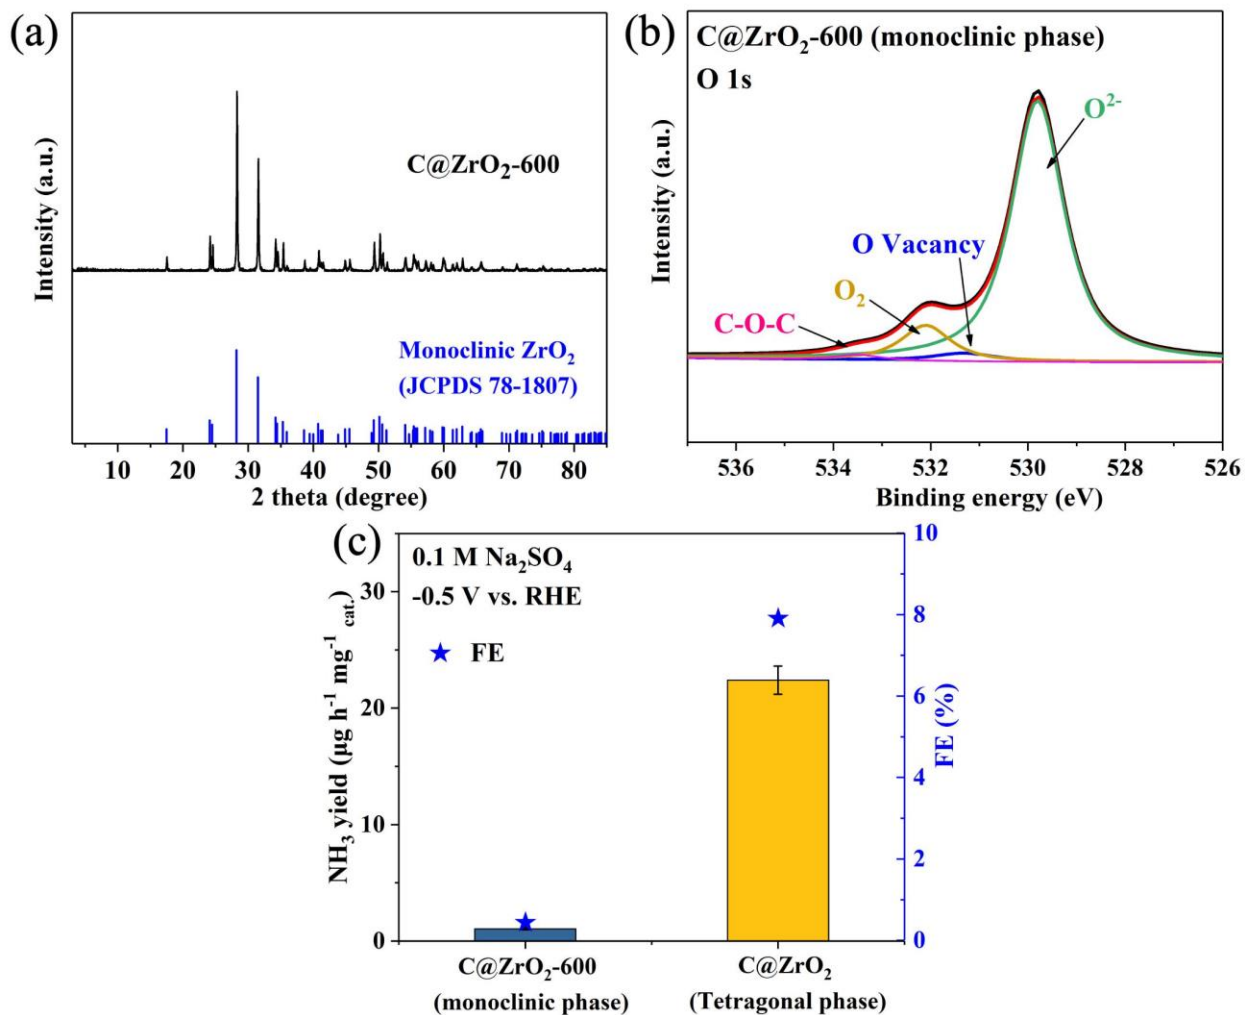

**Fig. S12.** (a) XRD pattern, (b) O 1s XPS pattern of monoclinic C@ZrO<sub>2</sub>-600. (c) NRR performance of C@ZrO<sub>2</sub>-600 and C@ZrO<sub>2</sub>.

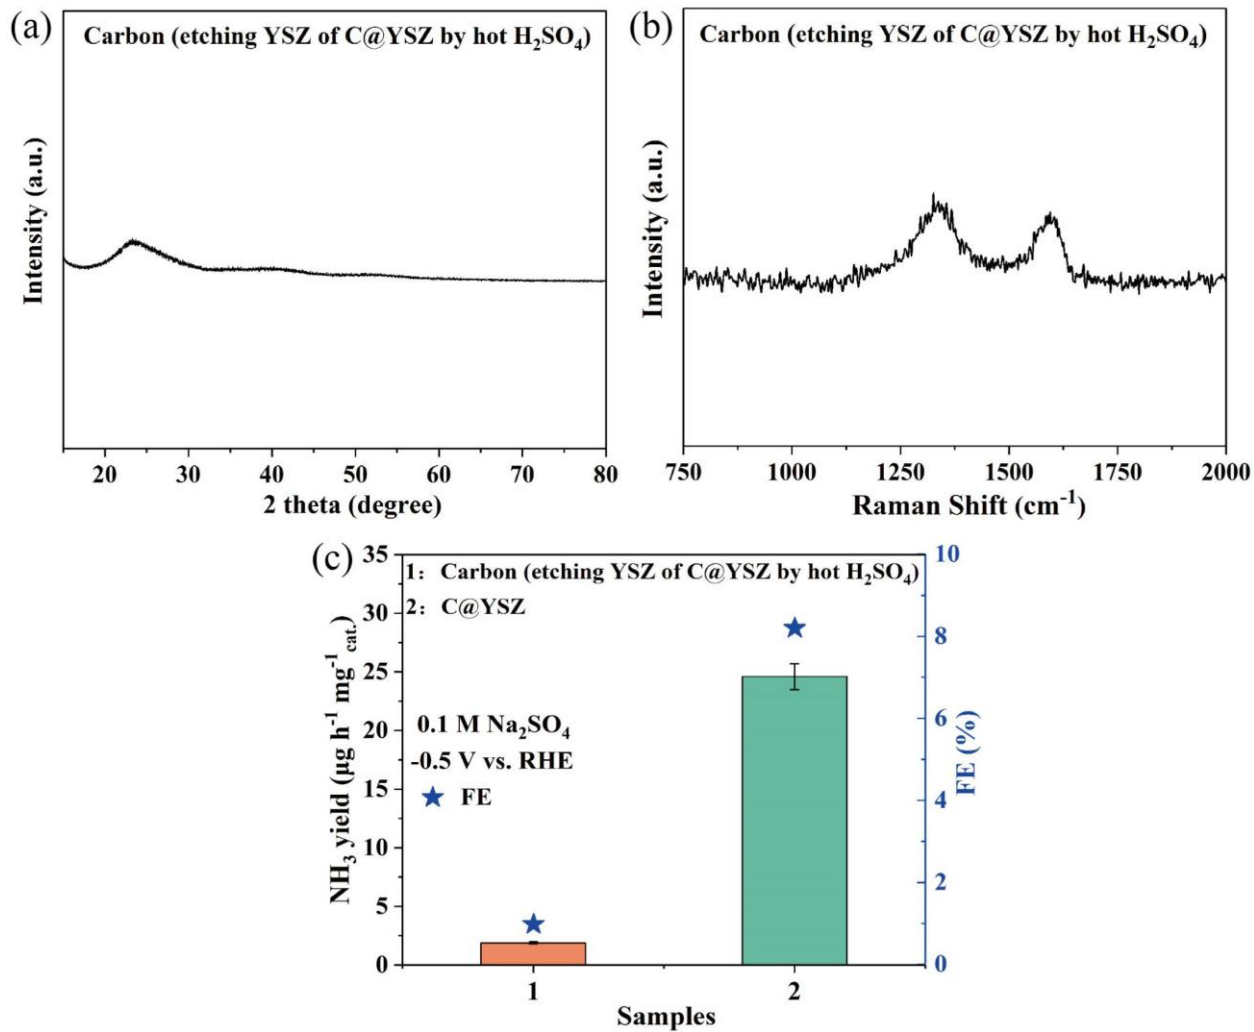

**Fig. S13.** (a) XRD pattern, (b) Raman pattern of carbon (etching YSZ of C@YSZ by hot H<sub>2</sub>SO<sub>4</sub>). (c) NRR performance of carbon (etching YSZ C@YSZ by hot H<sub>2</sub>SO<sub>4</sub>) and C@YSZ.

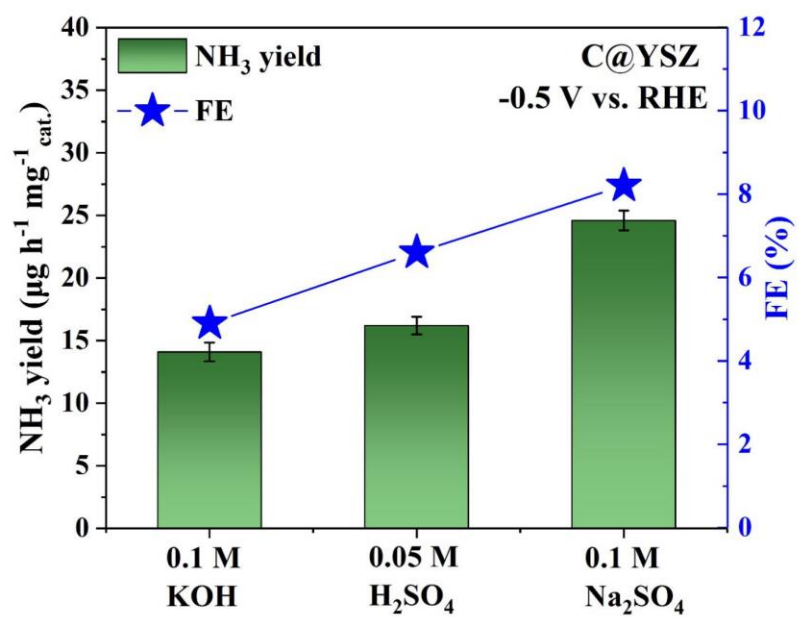

Fig. S14. NRR performance of C@YSZ in different electrolytes at -0.5 V.

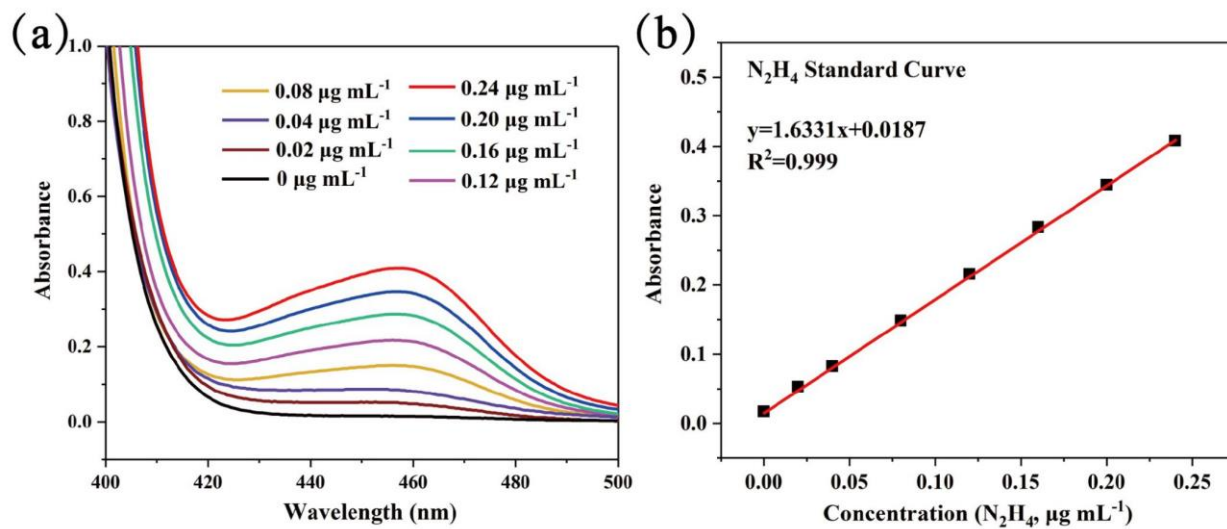

**Fig. S15.** (a) UV-Vis curves of various concentrations of  $N_2H_4$  stained with  $p-C_9H_{11}NO$  indicator.

(b) A calibration curve used to estimate the concentrations of  $N_2H_4$ .

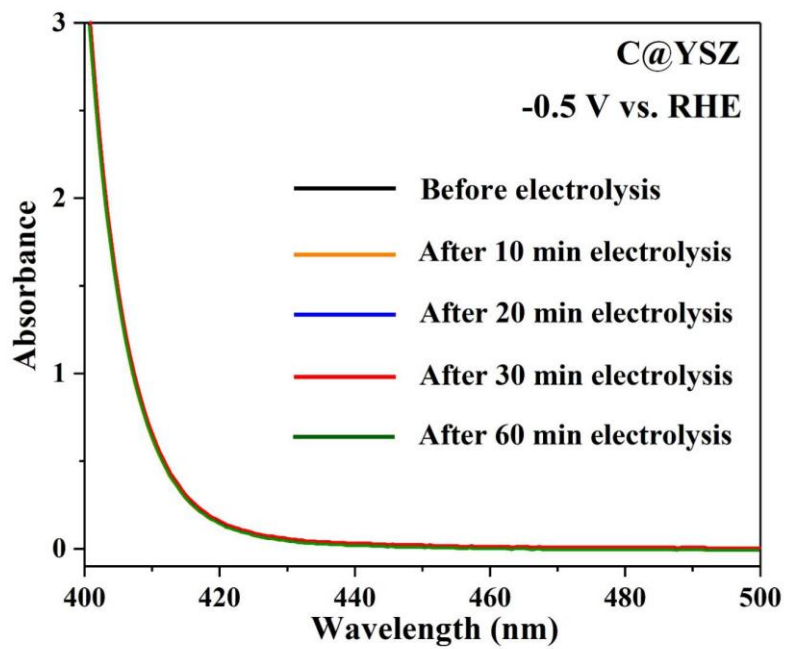

**Fig. S16.** UV-Vis absorption spectra of the electrolytes stained with p-C<sub>9</sub>H<sub>11</sub>NO indicator after NRR electrolysis at different time.

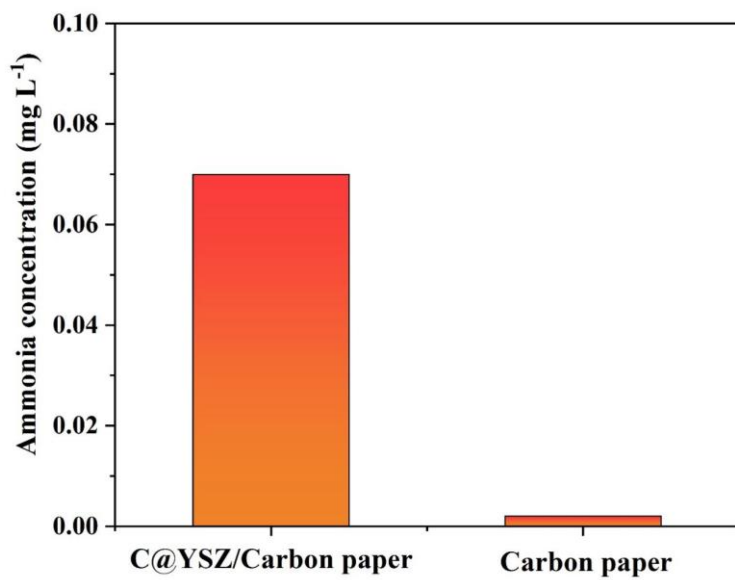

**Fig. S17.** Ammonia concentration of C@YSZ/CP and CP after 1 h electrolysis at a potential of -0.5 V under ambient conditions.

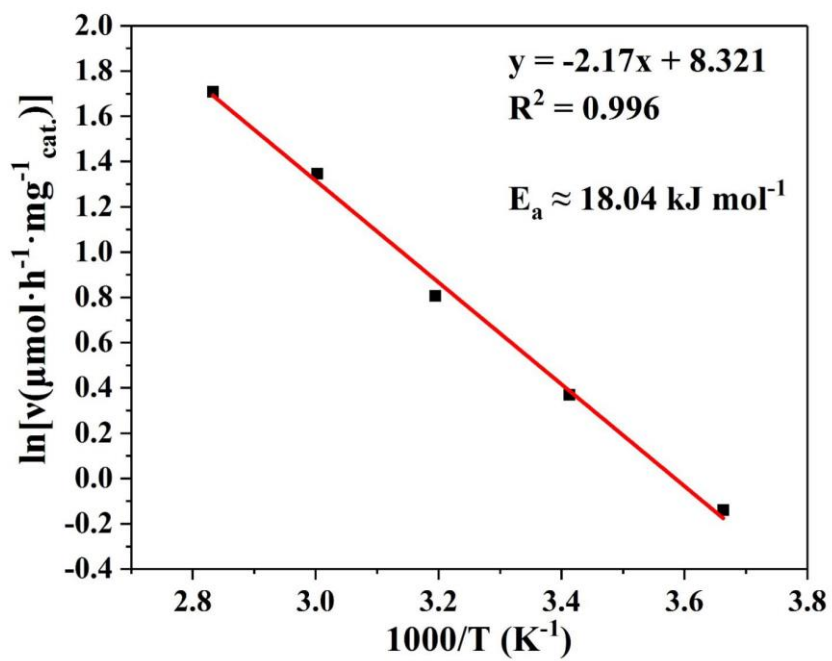

**Fig. S18.** Arrhenius plot of the NRR rate over C@YSZ catalyst at the temperature from 273 to 353 K.



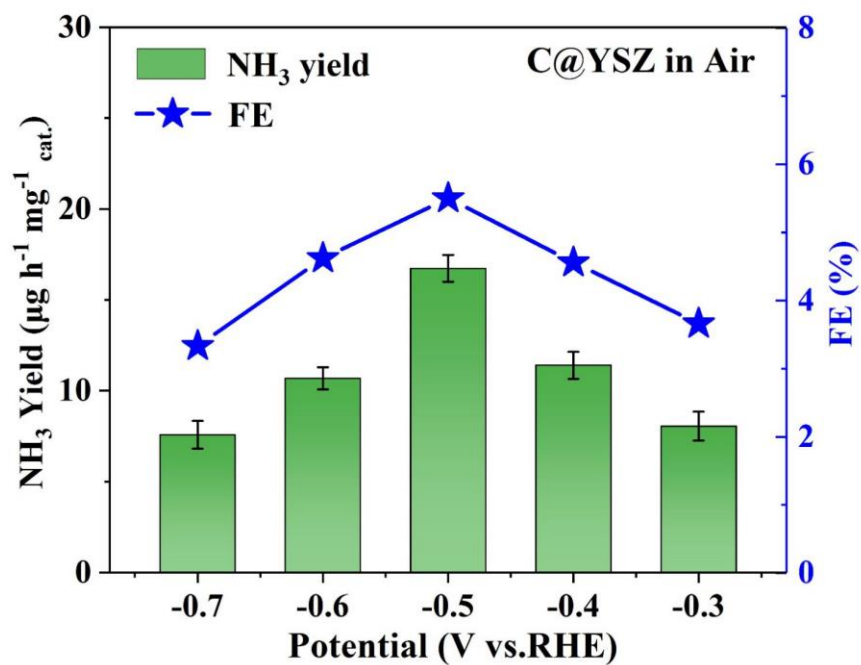

Fig. S19. NH<sub>3</sub> yields and FE for C@YSZ at different potentials in Air.

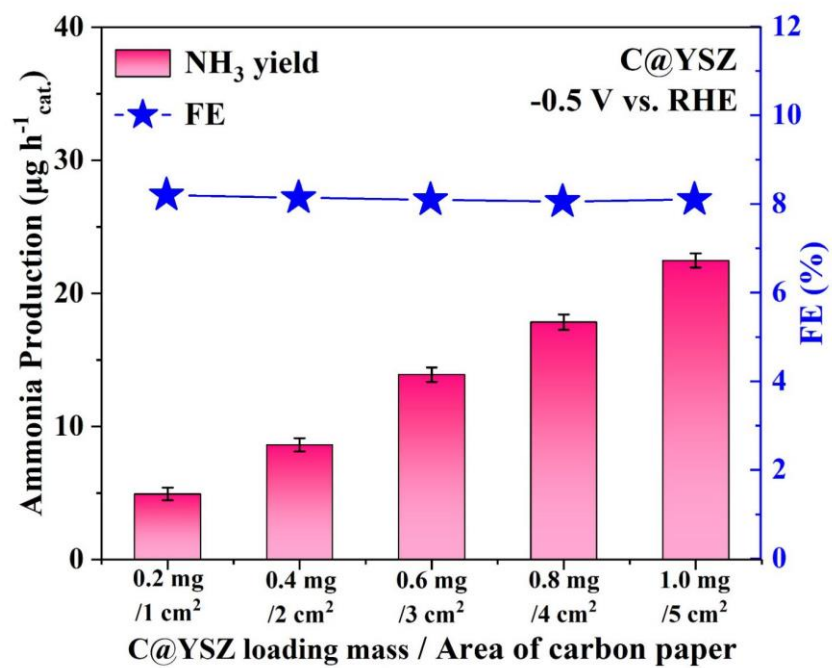

Fig. S20. NH<sub>3</sub> production and FE against the size of working electrode.

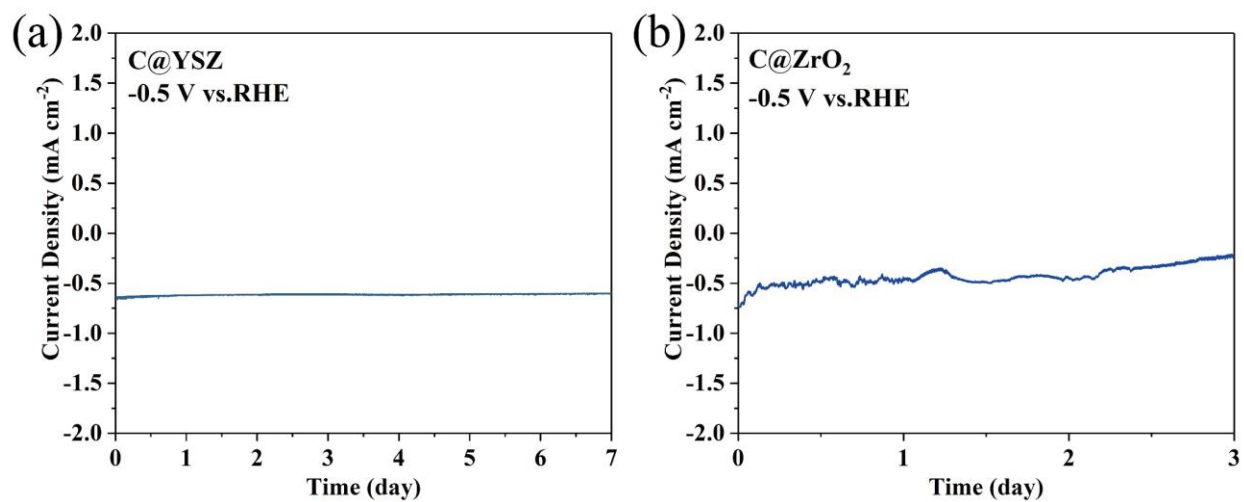

**Fig. S21.** (a) Time-dependent current density curve for C@YSZ in 7 days. (b) Time-dependent current density curve for C@ZrO<sub>2</sub> in 3 days.

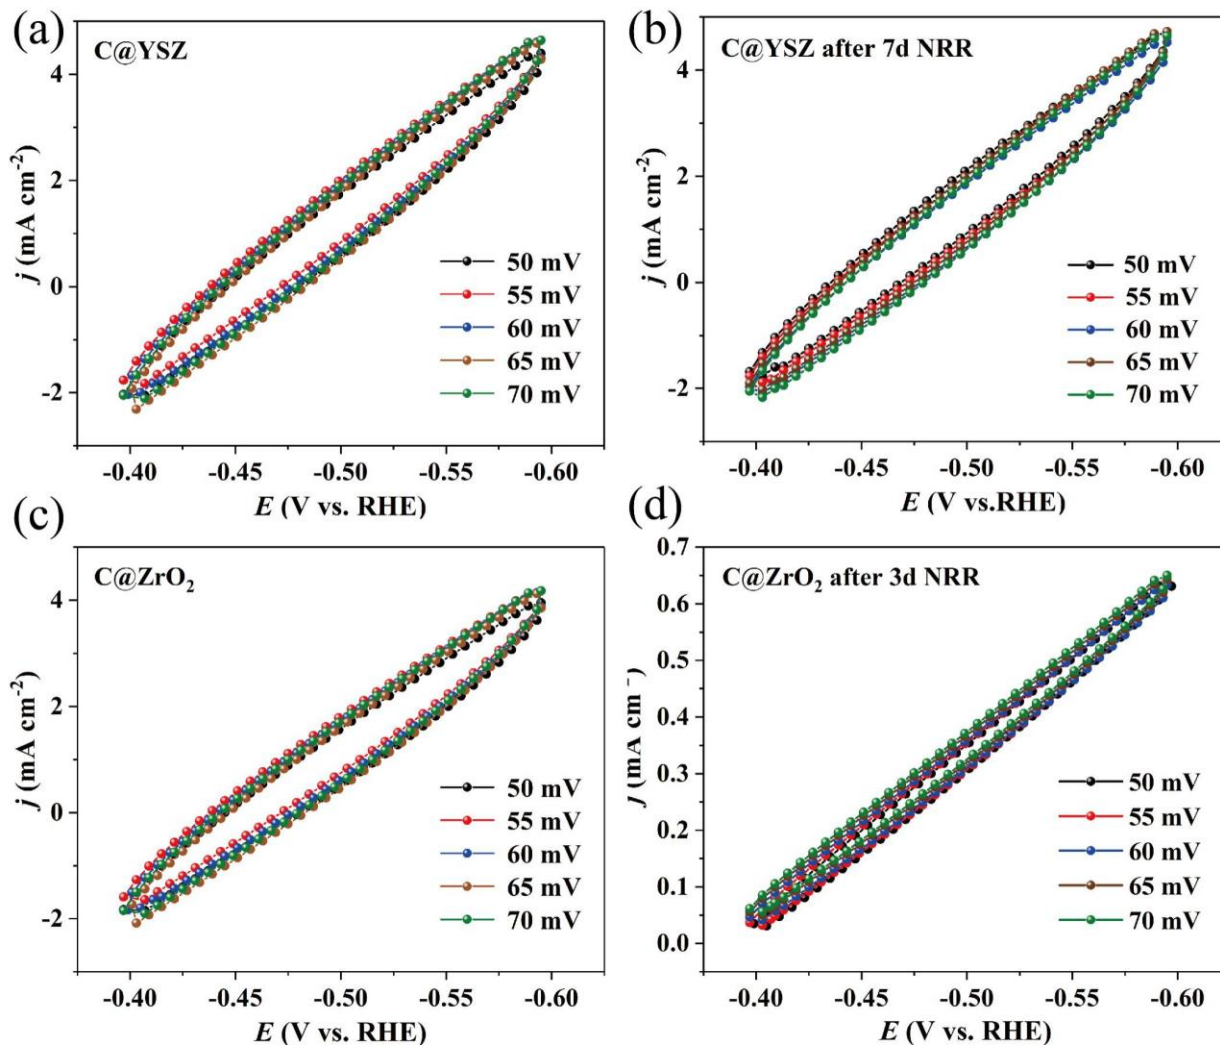

**Fig. S22.** The electrochemically active surface area characterization of (a) C@YSZ, (b) C@YSZ after 7 days NRR, (c) C@ZrO<sub>2</sub> and (d) C@ZrO<sub>2</sub> after 3 days NRR. All cyclic voltammetry curves were measured in non-faradaic capacitance current range at a scan rate of 50, 55, 60, 65 and 70  $\text{mV s}^{-1}$ .

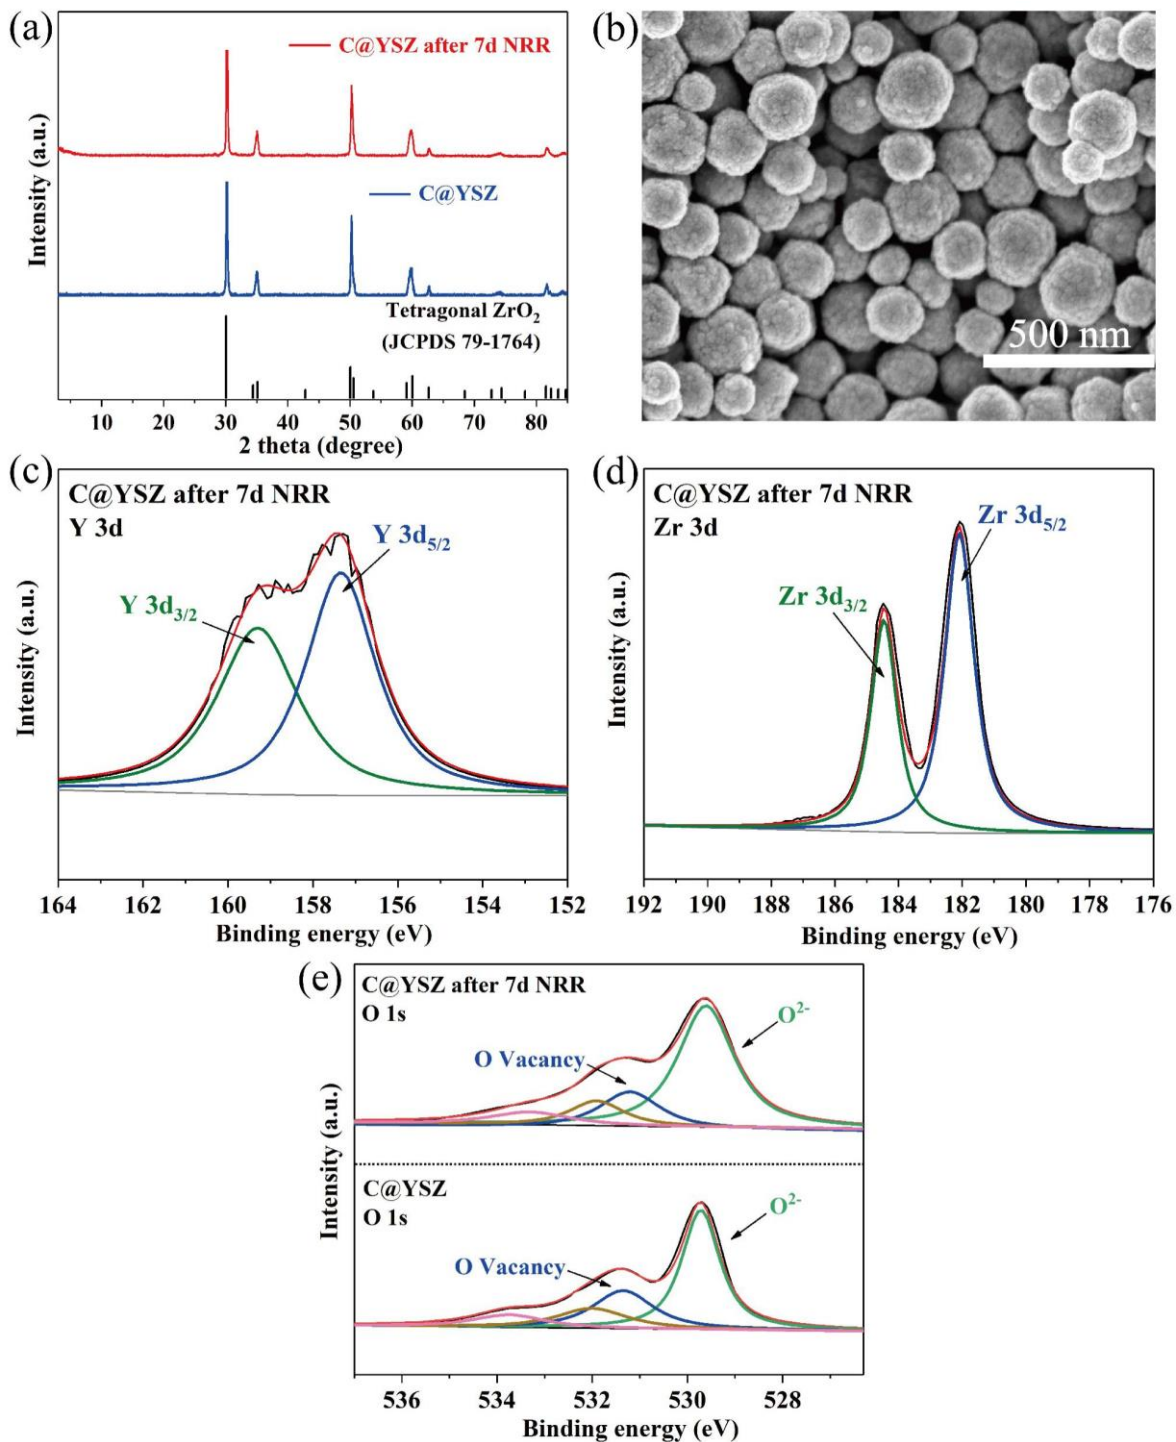

**Fig. S23.** (a) XRD pattern, (b) SEM image, (c) XPS Y 3d spectra, (d) XPS Zr 3d spectra and (e) XPS O 1s spectra of C@YSZ after 7 days NRR.

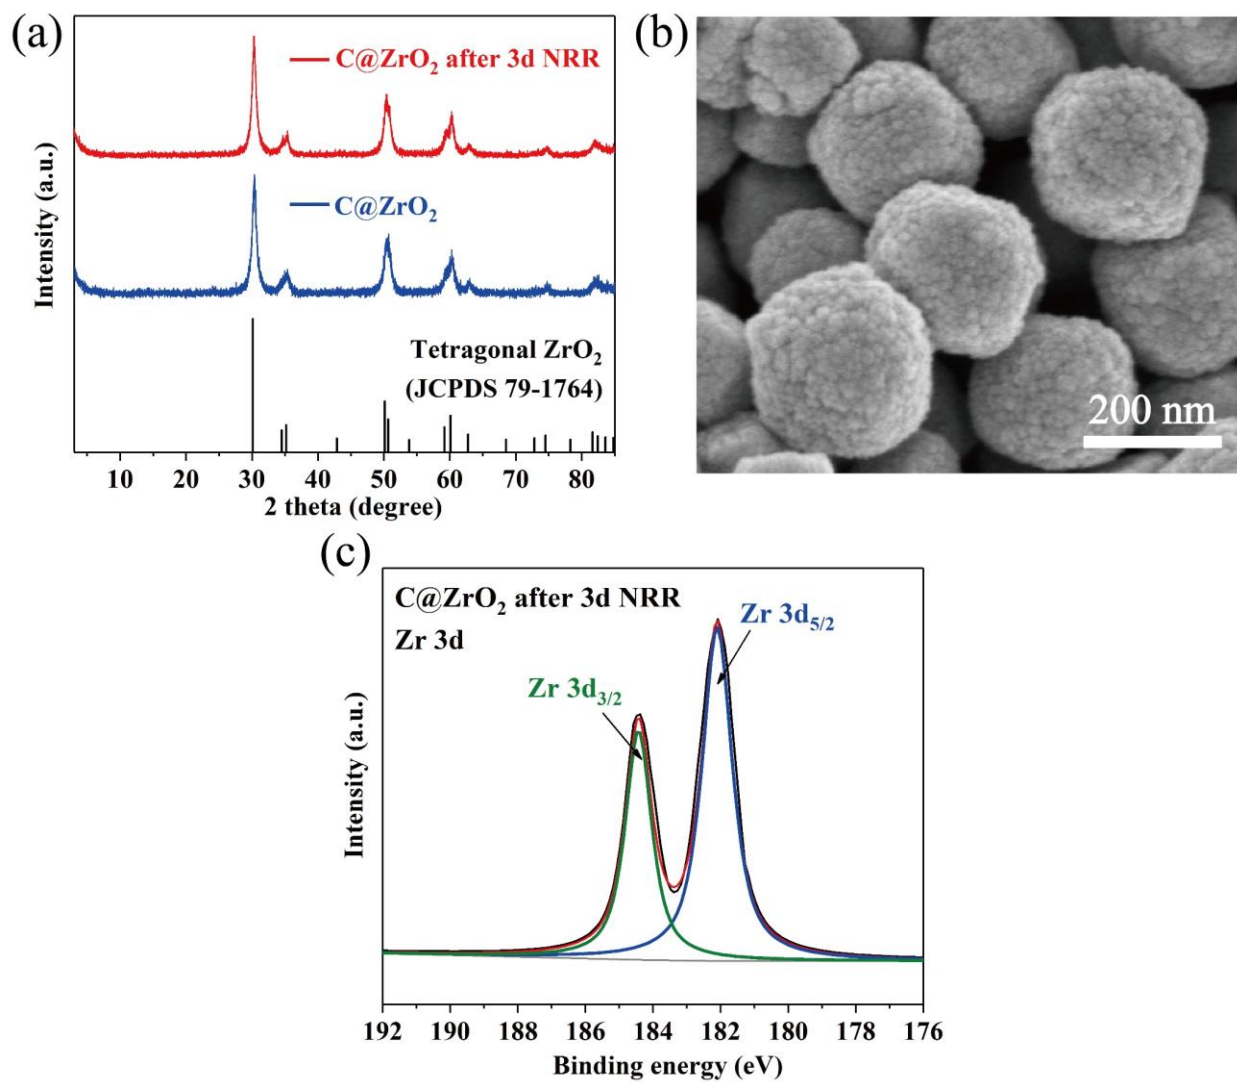

**Fig. S24.** (a) XRD pattern, (b) SEM image, (c) XPS Zr 3d spectra of C@ZrO<sub>2</sub> after 3 days NRR.

**Table S1.** Comparison of the electrocatalytic activity of C@YSZ to produce NH<sub>3</sub> through NRR with respect to the performances of other newly reported NRR electrocatalysts.

| Catalyst                                                         | Electrolyte                               | NH <sub>3</sub> yield<br>( $\mu\text{g h}^{-1} \text{mg}^{-1}$ ) | FE (%)     | Stability     | Reference                                                    |
|------------------------------------------------------------------|-------------------------------------------|------------------------------------------------------------------|------------|---------------|--------------------------------------------------------------|
| <b>C@YSZ</b>                                                     | <b>0.1 M Na<sub>2</sub>SO<sub>4</sub></b> | <b>24.6</b>                                                      | <b>8.2</b> | <b>7 days</b> | <b>This work</b>                                             |
| Cr-doped CeO <sub>2</sub>                                        | 0.1 M Na <sub>2</sub> SO <sub>4</sub>     | 16.82                                                            | 3.84       | 24 h          | <i>Inorg. Chem.</i> 2019, <b>58</b> , 5423-5427              |
| Bi <sub>2</sub> MoO <sub>6</sub>                                 | 0.1 M HCl                                 | 20.46                                                            | 8.17       | 24 h          | <i>ACS Sustain. Chem. Eng.</i> 2019, <b>7</b> , 12692-12696  |
| Co <sub>3</sub> O <sub>4</sub> @NC                               | 0.05M H <sub>2</sub> SO <sub>4</sub>      | 42.58                                                            | 8.49       | 24 h          | <i>ACS Appl. Mater. Inter.</i> 2019, <b>11</b> , 26891-26897 |
| C@NiO@Ni                                                         | 0.1 M KOH                                 | 43.15                                                            | 10.9       | 72 h          | <i>Sustain. Energ. Fuels.</i> 2020, <b>4</b> , 164-170       |
| Pd/C                                                             | 0.1 M PBS                                 | 4.5                                                              | 8.2        | 15 h          | <i>Nat. Commun.</i> 2018, <b>9</b> , 1795                    |
| N-doped porous carbon                                            | 0.05 M H <sub>2</sub> SO <sub>4</sub>     | 23.8                                                             | 1.42       | 20 h          | <i>ACS Catal.</i> 2018, <b>8</b> , 1186-1191                 |
| MoO <sub>3</sub>                                                 | 0.1 M HCl                                 | 29.43                                                            | 1.9        | 24 h          | <i>J. Mater. Chem. A</i> 2018, <b>6</b> , 12974-12977        |
| Nb <sub>2</sub> O <sub>5</sub> nanofiber                         | 0.1 M HCl                                 | 43.5                                                             | 9.26       | 27 h          | <i>Nano Energy</i> 2018, <b>52</b> , 264-270                 |
| hollow Cr <sub>2</sub> O <sub>3</sub> microspheres               | 0.1 M Na <sub>2</sub> SO <sub>4</sub>     | 25.3                                                             | 6.78       | 24 h          | <i>ACS Catal.</i> 2018, <b>8</b> , 8540-8544                 |
| Mn <sub>3</sub> O <sub>4</sub>                                   | 0.1 M Na <sub>2</sub> SO <sub>4</sub>     | 11.6                                                             | 3.0        | 24 h          | <i>Small</i> 2018, <b>14</b> , e1803111                      |
| MoS <sub>2</sub> Nanoflower                                      | 0.1 M Na <sub>2</sub> SO <sub>4</sub>     | 29.3                                                             | 8.34       | 26 h          | <i>Adv. Energy. Mater.</i> 2018, <b>8</b> , 1801357          |
| b-FeOOH nanorods                                                 | 0.5 M LiClO <sub>4</sub>                  | 23.3                                                             | 6.7        | 24 h          | <i>Chem. Commun.</i> 2018, <b>54</b> , 11332-11335           |
| TiO <sub>2</sub> -rGO                                            | 0.1 M Na <sub>2</sub> SO <sub>4</sub>     | 15.1                                                             | 3.3        | 24 h          | <i>J. Mater. Chem. A</i> 2018, <b>6</b> , 17303-17306        |
| B <sub>4</sub> C                                                 | 0.1 M HCl                                 | 26.6                                                             | 16.0       | 30 h          | <i>Nat. Commun.</i> 2018, <b>9</b> , 3485                    |
| Bi <sub>4</sub> V <sub>2</sub> O <sub>11</sub> /CeO <sub>2</sub> | 0.1 M HCl                                 | 23.21                                                            | 10.16      | 8 h           | <i>Angew. Chem., Int. Ed.</i> 2018, <b>57</b> , 6073-6076.   |

|                                                                 |                                        |       |       |      |                                                              |
|-----------------------------------------------------------------|----------------------------------------|-------|-------|------|--------------------------------------------------------------|
| TiO <sub>2</sub> /Ti <sub>3</sub> C <sub>2</sub> T <sub>x</sub> | 0.1 M HCl                              | 26.32 | 8.42  | 24 h | <i>Inorg. Chem.</i> 2019, <b>58</b> , 5414-5418              |
| NiO/Graphene                                                    | 0.1 M Na <sub>2</sub> SO <sub>4</sub>  | 18.6  | 7.8   | 32 h | <i>ACS Appl. Energy Mater.</i> 2019, <b>2</b> , 2288-2295    |
| Fe <sub>SA</sub> -N-C                                           | 0.001 M H <sub>2</sub> SO <sub>4</sub> | 7.48  | 56.55 | 30 h | <i>Nat. Commun.</i> 2019, <b>10</b> , 341                    |
| K <sub>2</sub> Ti <sub>4</sub> O <sub>9</sub>                   | 0.1 M KOH                              | 22.88 | 5.87  | 24 h | <i>Chem. Commun.</i> 2019, <b>55</b> , 7546-7549             |
| LiMn <sub>2</sub> O <sub>4</sub>                                | 0.1 M HCl                              | 15.83 | 7.44  | 24 h | <i>Inorg. Chem.</i> 2019, <b>58</b> , 9597-9601              |
| CeO <sub>2</sub> -rGO                                           | 0.1 M Na <sub>2</sub> SO <sub>4</sub>  | 16.98 | 4.78  | 24 h | <i>Chem. Commun.</i> 2019, <b>55</b> , 10717-10720           |
| MnO <sub>2</sub> /Ti <sub>3</sub> C <sub>2</sub> T <sub>x</sub> | 0.1 M HCl                              | 34.12 | 11.39 | 24 h | <i>J. Mater. Chem. A.</i> 2019, <b>7</b> , 18823-18827       |
| Ti <sub>3</sub> C <sub>2</sub> T <sub>x</sub>                   | 0.1 M HCl                              | 20.4  | 9.3   | 23 h | <i>J. Mater. Chem. A.</i> 2018, <b>6</b> , 24031-24035       |
| SnO <sub>2</sub> /RGO                                           | 0.1 M Na <sub>2</sub> SO <sub>4</sub>  | 25.6  | 7.1   | 10 h | <i>ACS Appl. Mater. Inter.</i> 2019, <b>11</b> , 31806-31815 |
| Sn/SnS <sub>2</sub>                                             | 0.1 M HCl                              | 23.8  | 3.4   | 10 h | <i>Small.</i> 2019, <b>15</b> , 1902535                      |
| Ta <sub>2</sub> O <sub>5</sub>                                  | 0.1 M HCl                              | 15.9  | 8.9   | 24 h | <i>ACS Sustain. Chem. Eng.</i> 2019, <b>7</b> , 9622-9628    |
| Y <sub>2</sub> O <sub>3</sub>                                   | 0.1 M Na <sub>2</sub> SO <sub>4</sub>  | 64.87 | 2.53  | 20 h | <i>Ind. Eng. Chem. Res.</i> 2018, <b>57</b> , 16622-16627    |
| ZnO/RGO                                                         | 0.1 M Na <sub>2</sub> SO <sub>4</sub>  | 17.7  | 6.4   | 10 h | <i>Chem. Eur. J.</i> 2019, <b>15</b> , 1902535               |
| TiO <sub>2</sub> /Ti <sub>3</sub> C <sub>2</sub> T <sub>x</sub> | 0.1 M HCl                              | 32.17 | 16.07 | 50 h | <i>Adv. Energy Mater.</i> 2019, <b>9</b> , 1803406           |
| Cr <sub>3</sub> C <sub>2</sub> @CNF                             | 0.1 M HCl                              | 23.9  | 8.6   | 24 h | <i>ACS Appl. Mater. Inter.</i> 2019, <b>11</b> , 35764-35769 |
| CoFe <sub>2</sub> O <sub>4</sub>                                | 0.1 M Na <sub>2</sub> SO <sub>4</sub>  | 0.151 | 6.2   | 8 h  | <i>Chem. Commun.</i> 2019, <b>55</b> , 12184-12187           |



|                                                |                                       |       |       |      |                                                              |
|------------------------------------------------|---------------------------------------|-------|-------|------|--------------------------------------------------------------|
| Fe <sub>3</sub> C@C                            | 0.05 M H <sub>2</sub> SO <sub>4</sub> | 8.53  | 9.15  | 12 h | <i>ACS Appl. Mater. Inter.</i> 2019, <b>11</b> , 40062–40068 |
| NbSe <sub>2</sub>                              | 0.1 M Na <sub>2</sub> SO <sub>4</sub> | 89.5  | 13.9  | 60 h | <i>Journal of Catalysis</i> 2020, <b>381</b> , 78-83         |
| N-C@NiO/GP                                     | 0.1 M HCl                             | 14.02 | 30.43 | 20 h | <i>ACS Sustain. Chem. Eng.</i> 2019, <b>7</b> , 18874–18883  |
| WO <sub>3</sub>                                | 0.1 M HCl                             | 17.28 | 7.0   | 24 h | <i>Nanoscale</i> 2019, <b>11</b> , 19274-19277               |
| TiC/C                                          | 0.1 M HCl                             | 14.1  | 5.8   | 24 h | <i>J. Mater. Chem. A</i> 2019, <b>7</b> , 19657-19661        |
| LaF <sub>3</sub>                               | 0.5 M LiClO <sub>4</sub>              | 55.9  | 16.0  | 24 h | <i>J. Mater. Chem. A</i> 2019, <b>7</b> , 17761-17765        |
| La <sub>2</sub> Ti <sub>2</sub> O <sub>7</sub> | 0.1 M HCl                             | 21.15 | 4.55  | 24 h | <i>Chem. Commun.</i> 2019, <b>55</b> , 6401-6404             |
